# Supplementary material for: Spatiotemporal Dynamics of Ecosystem Services Driven by Human Modification over the Past Seven Decades: A Case Study of Sihu Agricultural Watershed, China
Source: MDPI journal article supplement (doi:10.3390/land12030577), 2023-02-28
Supplement: s1 [file s1]

**Supplementary Material for**

**The spatiotemporal dynamics of ecosystem services driven by human modification over the past seven decades: a case study of Sihui agricultural watershed**

Haowen Lin<sup>a</sup>, Hong Yun<sup>b\*</sup>,

<sup>a</sup> College of Urban and Environmental Sciences, Peking University, Beijing, 100871, China

<sup>b</sup> School of Design, South China University of Technology, Guangzhou, 511436, China

\* Correspondence: [yunhong90@scut.edu.cn](mailto:yunhong90@scut.edu.cn)

**Table S1. The rice yield in different countries of different years.**

| <b>Rice (t)</b> | <b>1950</b> | <b>1980</b> | <b>1990</b> | <b>2001</b> | <b>2010</b> | <b>2018</b> |
|-----------------|-------------|-------------|-------------|-------------|-------------|-------------|
| Jingzhou        | 225800      | 748210      | 315065      | 274160      | 230790      | 219575      |
| Jiangling       | -           | -           | 295910      | 285460      | 293965      | 284725      |
| Jianli          | 270190      | 774340      | 933735      | 777330      | 1338505     | 1402975     |
| Honghu          | 128400      | 461460      | 479980      | 485185      | 649630      | 699000      |
| Qianjiang       | 96140.7085  | 311694.2642 | 371617.97   | 246233.2638 | 344945.6297 | 394973.2362 |
| Shashi          | 2500        | -           | 92585       | 65890       | 86145       | 73025       |
| Shayang         | 160326.8423 | 495893.8931 | 729512.9747 | 552259.1743 | 624411.9092 | 630488.6113 |
| Shishou         | 32726.976   | 89481.776   | 94344.16    | 87564.864   | 51669.5     | 64429.25    |
| Total           | 916084.5268 | 2881079.933 | 3312750.105 | 2774082.302 | 3620062.039 | 3769191.098 |

**Table S2. The cotton yield in different countries of different years.**

| <b>Cotton (t)</b> | <b>1950</b> | <b>1980</b> | <b>1990</b> | <b>2001</b> | <b>2010</b> | <b>2018</b> |
|-------------------|-------------|-------------|-------------|-------------|-------------|-------------|
| Jingzhou          | 5637        | 16467.55    | 9899        | 11140.3335  | 13960       | 4245        |
| Jiangling         | -           | -           | 9107        | 13025.25    | 10424       | 4444.5      |
| Jianli            | 8289        | 12713.8     | 16704.4     | 16830.5715  | 28877       | 12319.5     |
| Honghu            | 3739.5      | 11539.27    | 15266.6665  | 9733.3335   | 10357.3335  | 4615.75     |
| Qianjiang         | 3888.7244   | 12101.2169  | 15530.8229  | 24400.879   | 30331.4735  | 7596.6824   |
| Shashi            | 63          | -           | 2585.4      | 4296.2      | 4749        | 2064.25     |
| Shayang           | 1045.1311   | 6029.032    | 10278.0728  | 8148.0576   | 9363.992    | 2858.3043   |
| Shishou           | 1659.312    | 2815.9176   | 4596.32     | 4695.066667 | 12361.5     | 6525        |
| Total             | 24321.6675  | 61666.7865  | 83967.6822  | 92269.69177 | 120424.299  | 44668.9867  |

**Table S3. The oil crop yield in different countries of different years.**

| <b>Oil crop (t)</b> | <b>1950</b> | <b>1980</b> | <b>1990</b> | <b>2001</b> | <b>2010</b> | <b>2018</b> |
|---------------------|-------------|-------------|-------------|-------------|-------------|-------------|
| Jingzhou            | 7251.3      | 8299.4675   | 25932.8     | 43333.3335  | 57679       | 44162.25    |
| Jiangling           | -           | -           | 24218.6     | 47648.5     | 70084       | 74518.75    |
| Jianli              | 4501.2      | 14908.48    | 47025.9     | 80220.143   | 119038.3335 | 119321.75   |
| Honghu              | 4733.5      | 9178.75     | 26466.6665  | 45950       | 83033.3335  | 86470       |
| Qianjiang           | 2436.7516   | 5021.8487   | 24640.8449  | 59087.163   | 77539.0561  | 60185.187   |
| Shashi              | -           | -           | 6245.2      | 6881        | 10098       | 8056.75     |
| Shayang             | 2948.5191   | 12295.5076  | 52210.5534  | 89594.1934  | 115298.3404 | 121486.2397 |
| Shishou             | 1006.4248   | 2849.08728  | 10161.5104  | 15378.22933 | 26317.75    | 28660.5     |
| Total               | 22877.6955  | 52553.14108 | 216902.0752 | 388092.5622 | 559087.8135 | 542861.4267 |

**Table S4.** The freshwater products in different countries of different years.

| Freshwater products (t) | 1950       | 1980       | 1990        | 2001        | 2010        | 2018        |
|-------------------------|------------|------------|-------------|-------------|-------------|-------------|
| Jingzhou                | 4269       | 15997.28   | 36062.4     | 43212       | 117864.6665 | 128660.75   |
| Jiangling               | -          | -          | 16800.4     | 21135       | 29973       | 34099.75    |
| Jianli                  | 7374.3     | 19996.6    | 69120       | 122475      | 261554.6665 | 292312.75   |
| Honghu                  | 11931      | 23062.6    | 118701.8    | 187442.25   | 392863      | 454807.75   |
| Qianjiang               | 1486.4292  | 9431.63    | 42380.5311  | 60000.6054  | 90081.6514  | 103344.7457 |
| Shashi                  | 62         | -          | 21130.4     | 39050.75    | 54198       | 55327       |
| Shayang                 | 1848.7536  | 9361.3119  | 63388.8907  | 83224.7788  | 163896.86   | 184756.3198 |
| Shishou                 | 646.024    | 1330.504   | 9040.84     | 19701.616   | 19342.07    | 20328.27    |
| Total                   | 27617.5068 | 79179.9259 | 376625.2618 | 576242.0002 | 1129773.914 | 1273637.336 |

**Table S5.** The sensitive analysis of parameters through SWAT-CUP in outlet of Sihui watershed.

| Parameters           | P-Value | t-Stat |
|----------------------|---------|--------|
| 1:R__CN2.mgt         | 0.00    | 8.79   |
| 15:V__CH_N2.rte      | 0.00    | 4.04   |
| 10:V__ESCO.hru       | 0.00    | 3.08   |
| 13:R__SLSUBBSN.hru   | 0.01    | -2.63  |
| 5:R__SOL_AWC(..).sol | 0.02    | 2.25   |
| 21:V__SMTMP.bsn      | 0.03    | -2.12  |
| 18:V__RCHRG_DP.gw    | 0.07    | 1.81   |
| 9:V__REVAPMN.gw      | 0.09    | -1.71  |
| 14:V__CH_K2.rte      | 0.13    | 1.53   |
| 8:V__GW_REVAP.gw     | 0.14    | -1.50  |
| 22:V__SMFMX.bsn      | 0.22    | -1.22  |
| 12:R__OV_N.hru       | 0.30    | 1.04   |
| 19:V__SURLAG.bsn     | 0.32    | 1.00   |
| 2:V__ALPHA_BF.gw     | 0.38    | -0.88  |
| 17:V__EPCO.hru       | 0.44    | -0.77  |
| 4:V__GWQMN.gw        | 0.46    | -0.74  |
| 16:V__ALPHA_BNK.rte  | 0.51    | 0.67   |
| 6:R__SOL_K(..).sol   | 0.57    | 0.57   |
| 11:R__HRU_SLP.hru    | 0.64    | -0.47  |
| 7:R__SOL_BD(..).sol  | 0.71    | -0.37  |
| 20:V__SFTMP.bsn      | 0.85    | -0.19  |
| 23:V__SMFMN.bsn      | 0.87    | -0.16  |
| 3:V__GW_DELAY.gw     | 0.97    | 0.04   |

**Table S6.** The simulation results of monthly runoff during the period of model calibration (2015-2017) and model validation (2018-2019).

|           | Parameters           | Wateshed outlet (FLOW_OUT_16) |
|-----------|----------------------|-------------------------------|
| 2015-2017 | R2                   | 0.79                          |
|           | Nash-Suttcliffe (NS) | 0.77                          |

|           |                      |      |
|-----------|----------------------|------|
| 2018-2019 | R2                   | 0.75 |
|           | Nash-Suttcliffe (NS) | 0.73 |

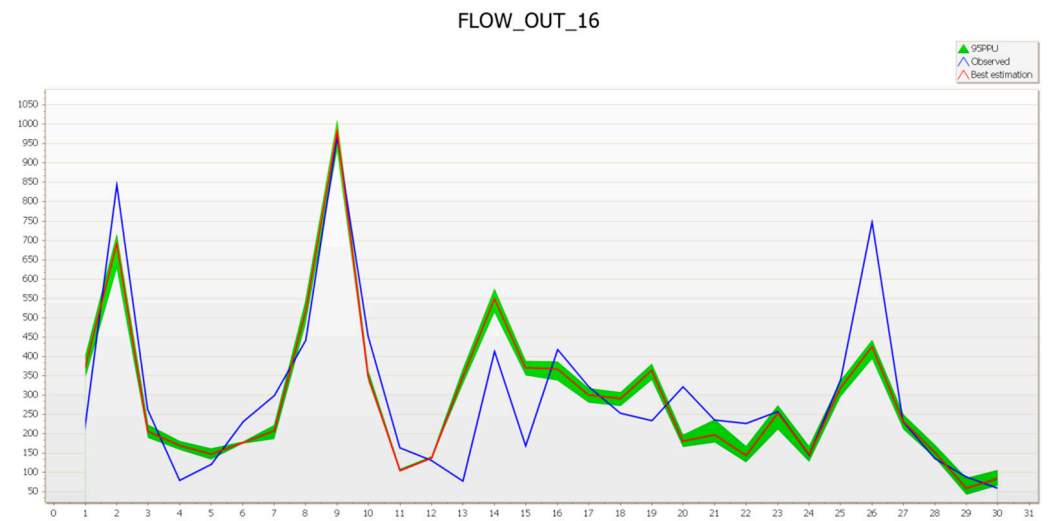

**Figure 1.** The observed value and predicted value on monthly runoff of watershed outlet (FLOW\_OUT\_16) in 2015-2019.

**Table S7.** The Biophysical table for the habitat quality model (the parameters in the habitat quality model are cited from references[1–4].

|                                                               |                       | Threats       |             |             |        |        |        |
|---------------------------------------------------------------|-----------------------|---------------|-------------|-------------|--------|--------|--------|
|                                                               |                       | Habitat score | Agriculture | settlements | Road   | Canals | Levees |
| Relative sensitivity of different land-use classes to threats | Weight                | -             | 0.7         | 0.9         | 0.5    | 0.5    | 0.5    |
|                                                               | Maximum distance (km) | -             | 3           | 5           | 3      | 3      | 3      |
|                                                               | Function              |               | Exponential | Exponential | Linear | Linear | Linear |
|                                                               | Wetland               | 0.9           | 0.8         | 0.7         | 0.5    | 0.7    | 0.5    |
|                                                               | Lake                  | 0.9           | 0.8         | 0.7         | 0.5    | 0.7    | 0.5    |
|                                                               | Settlement            | 0             | 0           | 0           | 0      | 0      | 0      |
|                                                               | Agriculture           | 0.4           | 0           | 0.5         | 0.5    | 0.5    | 0.5    |
|                                                               | Ponds                 | 0.3           | 0.7         | 0.5         | 0.5    | 0.5    | 0.5    |

**Table S8.** The biodiversity of Honghu Lake in different decades (the data of biological species is from the relevant reference[5–9].)

| Biological specials | 1950s | 1980s | 1990s | 2010s |
|---------------------|-------|-------|-------|-------|
| Fish                | 114   | 79    | 57    | 49    |
| Aquatic Plant       | 158   | 68    | 94    | 93    |
| Benthos             | 98    | 66    | 71    | 18    |
| Bird                | 167   | 167   | 130   | 49    |
| Biodiversity index  | 1.468 | 1.361 | 1.353 | 1.041 |

**Table S9.** The livestock breeding pollution

| Countries | Pig     | Cow   | Sheep | Poultry  | TN (t)    | TP(t)    |
|-----------|---------|-------|-------|----------|-----------|----------|
| Jingzhou  | 368500  | 1487  | 9515  | 16531800 | 3089.681  | 892.790  |
| Jiangling | 263200  | 3979  | 6809  | 5244400  | 1663.493  | 480.681  |
| Jianli    | 725000  | 5068  | 1630  | 14572500 | 4448.252  | 1285.361 |
| Honghu    | 355200  | 2322  | 1741  | 3779800  | 1868.286  | 539.858  |
| Shayang   | 917000  | 48013 | 23234 | 12036400 | 5928.229  | 1713.013 |
| Qianjiang | 787100  | 12476 | 15160 | 10668180 | 4518.149  | 1305.558 |
| Sum       | 3416000 | 73345 | 58089 | 62833080 | 21516.089 | 6217.261 |

**Table S10.** The aquaculture pollution

| Countries | Freshwater<br>Products (t) | TN (t)     | TP(t)     |
|-----------|----------------------------|------------|-----------|
| Jingzhou  | 108579                     | 146.038755 | 10.315005 |
| Shashi    | 43753                      | 58.847785  | 4.156535  |
| Jiangling | 29259                      | 39.353355  | 2.779605  |
| Jianli    | 256754                     | 345.33413  | 24.39163  |
| Honghu    | 394247                     | 530.262215 | 37.453465 |
| Shayang   | 171848                     | 231.13556  | 16.32556  |
| Qianjiang | 103632                     | 139.38504  | 9.84504   |
| Sum       | 1108072                    | 1490.35684 | 105.26684 |

**Table S11.** The rural life pollution

| Countries | Population (ten<br>thousand) | TN (t)   | TP(t)   |
|-----------|------------------------------|----------|---------|
| Jingzhou  | 46.97                        | 729.088  | 62.322  |
| Shashi    | 117.85                       | 1829.316 | 156.369 |
| Jiangling | 29.28                        | 454.496  | 38.850  |
| Jianli    | 66.81                        | 1037.052 | 88.647  |
| Honghu    | 26.65                        | 413.672  | 35.360  |
| Shayang   | 11.73                        | 182.078  | 15.564  |
| Qianjiang | 51.1785                      | 794.414  | 67.906  |
| Sum       | 350.4685                     | 5440.117 | 465.018 |

**Table S12.** The Biophysical table for the Nutrients Delivery model

| description | lucode | load_n | eff_n | crit_len_n | load_p | eff_p | crit_len_p | proportion_subsurface_n |
|-------------|--------|--------|-------|------------|--------|-------|------------|-------------------------|
| Nodata      | 0      | 0      | 0     | 0          | 0      | 0     | 0          | 0                       |
| Wetland     | 1      | 0      | 0.46  | 300        | 0      | 0.62  | 300        | 0                       |
| Lake        | 2      | 0      | 0.36  | 150        | 0      | 0.52  | 150        | 0                       |
| Settlement  | 3      | 5.793  | 0     | 30         | 0.495  | 0     | 30         | 0                       |
| Agriculture | 4      | 18     | 0.15  | 30         | 3      | 0.15  | 30         | 0                       |
| Pond        | 5      | 9.5    | 0.15  | 30         | 0.55   | 0.15  | 30         | 0                       |

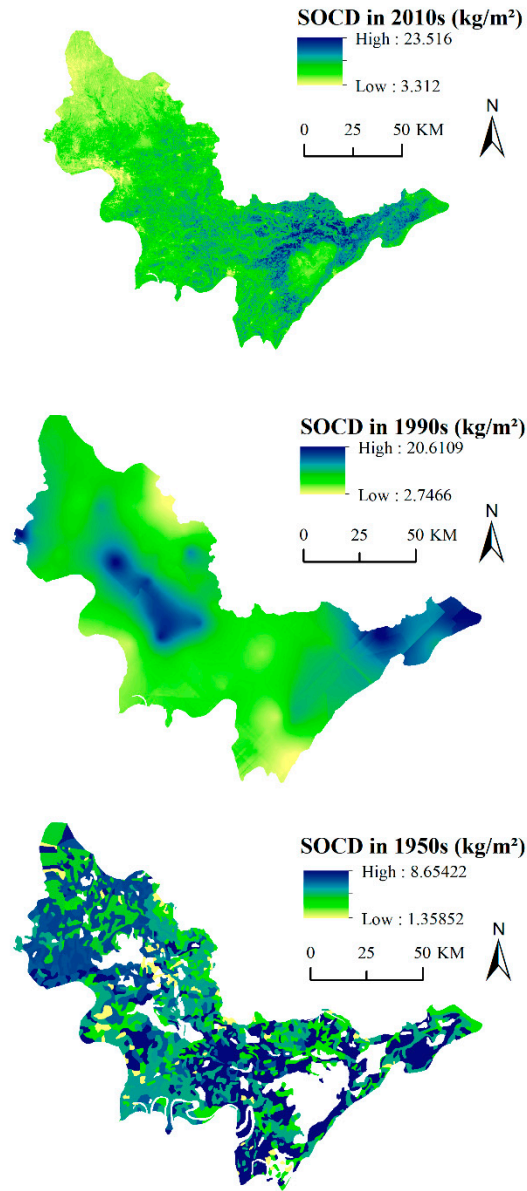

**Figure S2.** The soil organic matter and PH value in 1950s, 1990s, 2010s. (The data of SOCD in 2010s was based on the research of Liu et al and downloaded from National Earth System Data Center (<http://www.geodata.cn> (accessed on 3 February 2023)). SOCD in 1990s was generated by ordinary kriging method based on the data of 112 soil profiles from soil chronicles. SOCD in 1950s was extracted from the soil map of Jingzhou in 1959.

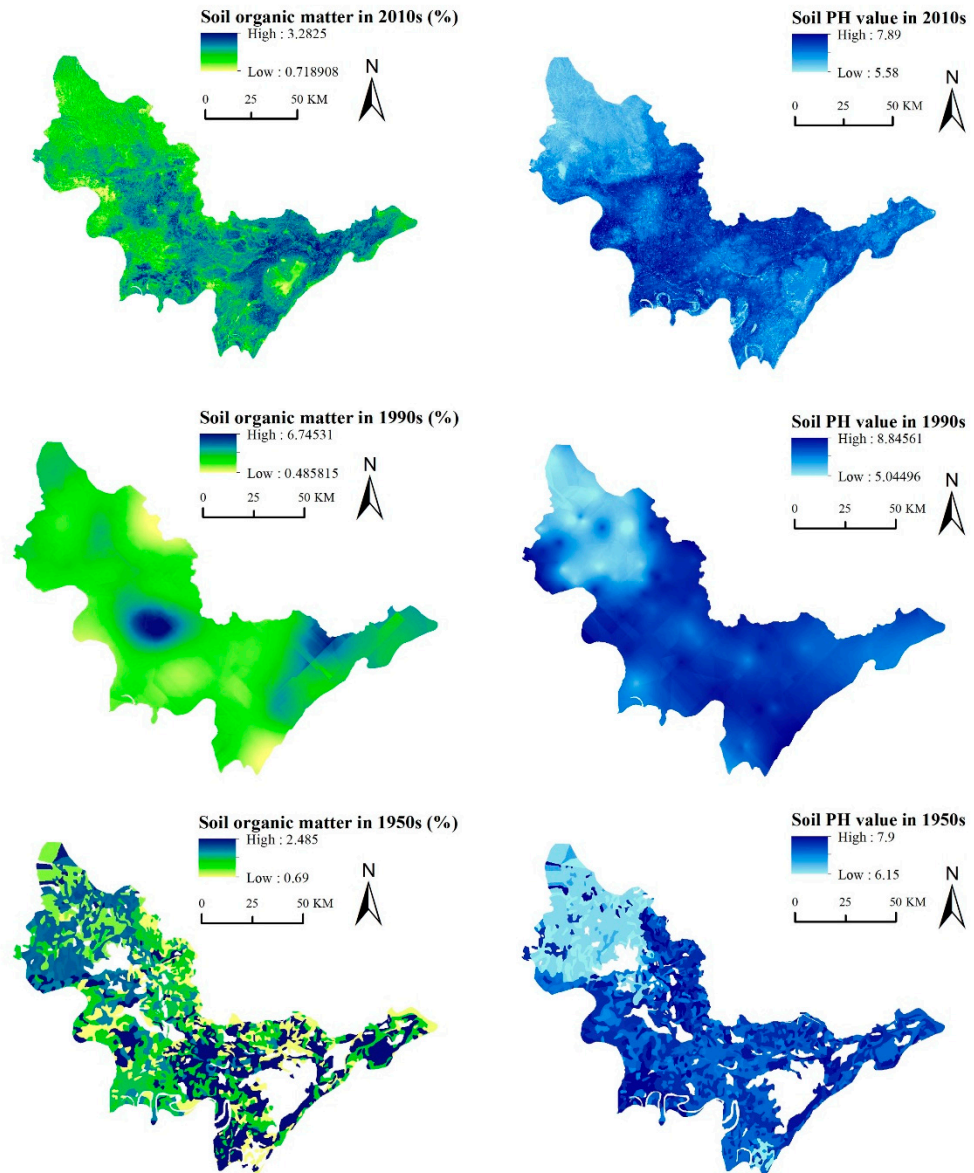

**Figure S3.** The soil organic matter and PH value in 1950s, 1990s, 2010s. (The data in 2010s is downloaded from National Earth System Science Data Center (<http://www.geodata.cn> (accessed on 3 February 2023)) and had been used in Liu et al (2022)[10]; the data in 1990s is generated by the ordinary kriging method based on the sample data from soil chronicles of different countries; the data in 1950s is from Jingzhou Turang (1959)).

**Table S13.** Overview of potential human modification drivers of ecosystem services

| Human modification drivers | Description                                          | Unit                             | Source                                                                                                                |
|----------------------------|------------------------------------------------------|----------------------------------|-----------------------------------------------------------------------------------------------------------------------|
| Lake reclamation intensity | Lake area                                            | hm <sup>2</sup> /km <sup>2</sup> | The land use data                                                                                                     |
| Population density         | The total number of people per square kilometers     | Inhabitants/km <sup>2</sup>      | the rural statistical yearbook of Hubei, the statistical yearbook of Jingzhou and the statistical yearbook of Jingmen |
| Fertilizer intensity       | The total yearly fertilizer of per square kilometers | t/km <sup>2</sup> ·y             |                                                                                                                       |

|                                 |                                                      |                      |                                                                                                                        |
|---------------------------------|------------------------------------------------------|----------------------|------------------------------------------------------------------------------------------------------------------------|
| Insecticide intensity           | The total yearly fertilizer of per square kilometers | t/km <sup>2</sup> ·y | ( <a href="http://data.cnki.net">http://data.cnki.net</a> (accessed on 3 February 2023)).                              |
| Hydraulic engineering intensity | The total ditch length of per square kilometers      | Km/km <sup>2</sup>   | The map of ditch distribution in 1980s and 2010s were obtained from Jingzhou Sihou Basin Engineering Management Bureau |

## References

1. Gong, J.; Xie, Y.; Cao, E.; Huang, Q.; Li, H. Integration of InVEST-Habitat Quality Model with Landscape Pattern Indexes to Assess Mountain Plant Biodiversity Change: A Case Study of Bailongjiang Watershed in Gansu Province. *Journal of Geographical Sciences* **2019**, *29*, 1193–1210.
2. Terrado, M.; Sabater, S.; Chaplin-Kramer, B.; Mandle, L.; Ziv, G.; Acuña, V. Model Development for the Assessment of Terrestrial and Aquatic Habitat Quality in Conservation Planning. *Science of the total environment* **2016**, *540*, 63–70.
3. Leh, M.D.; Matlock, M.D.; Cummings, E.C.; Nalley, L.L. Quantifying and Mapping Multiple Ecosystem Services Change in West Africa. *Agriculture, ecosystems & environment* **2013**, *165*, 6–18.
4. Yohannes, H.; Soromessa, T.; Argaw, M.; Dewan, A. Spatio-Temporal Changes in Habitat Quality and Linkage with Landscape Characteristics in the Beressa Watershed, Blue Nile Basin of Ethiopian Highlands. *Journal of Environmental Management* **2021**, *281*, 111885.
5. Heng, Li.; Dai, Lv. A survey report on the benthic fauna of Honghu Lake. *Freshwater Fisheries* **1985**, 25–29.
6. Wei, Hao.; Shi, Wang. Preliminary evaluation of the benthic community structure of Hong Lake and its effect on water quality. *Journal of Aquatic Biology*, **1995**, *2*, 124–134
7. M, Zhu. Biodiversity Conservation and Ecological Management of Honghu Wetland. **2007**.
8. Wei, Wu., Ling, Wang., Bin, Zhang., Qi, Liao., Kan, Wang., Jie, Tang., Yang, Li. Research on aquatic biodiversity and water quality evaluation of Hong Lake. *Environment science and management* **2015**, 184–187.
9. Hong, Chen. Aquatic vegetation of Hong Lake. *Journal of Aquatic Biology* **1963**, *3*, 69–80.
10. Liu, F.; Wu, H.; Zhao, Y.; Li, D.; Yang, J.L.; Song, X.; Shi, Z.; Zhu, A.X.; Zhang, G.L. Mapping High Resolution National Soil Information Grids of China. *Science Bulletin* **2022**, *67*, 328–340.
